# Supplementary material
Source: Springer Nature journal article supplement (https://www.springermedizin.de/resource/supplementary/13034_2011_158_MOESM1_ESM.pdf/9652440)

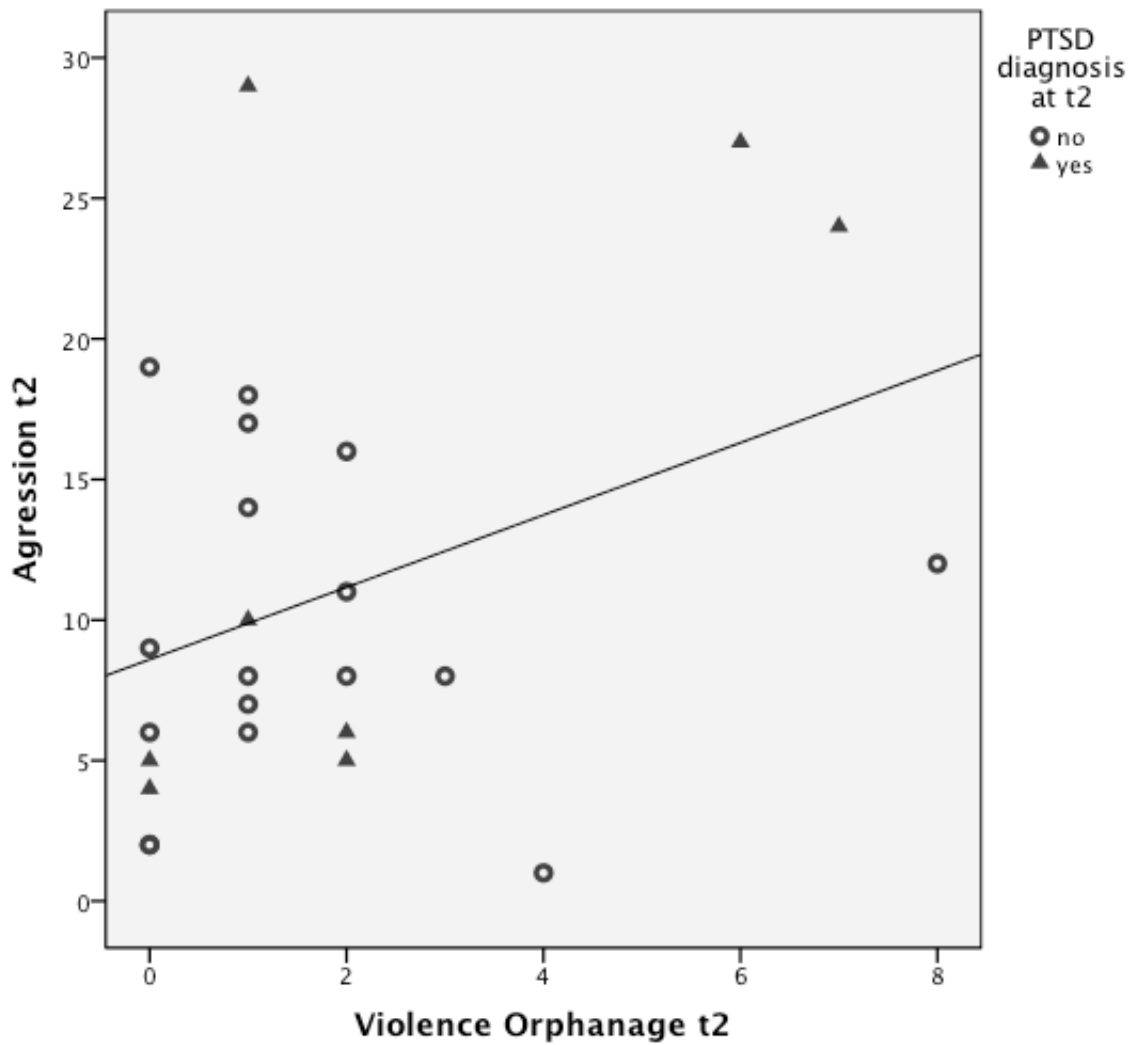

Supplement: MOESM1 [file 9652440]
